# Supplementary material
Source: MDPI journal article supplement (https://www.mdpi.com/2073-4352/13/2/296)
Supplement: s1 [file s1]

**Electronic supplementary information for:**

**Two crystal forms of 4'-methyl-2,4-dinitrodiphenylamine: polymorphism governed by conformational flexibility of a supramolecular synthon**

Ivan V. Fedyanin<sup>1,2</sup> and Aida I. Samigullina<sup>2</sup>

<sup>1</sup>A. N. Nesmeyanov Institute of Organoelement Compounds, Russian Academy of Sciences,  
Vavilova st. 28, 119991 Moscow, Russian

<sup>2</sup>N. D. Zelinsky Institute of Organic Chemistry, Russian Academy of Sciences, 47 Leninsky prosp.,  
119991 Moscow, Russian

**Table of Contents**

|                                                                                              |    |
|----------------------------------------------------------------------------------------------|----|
| 1. Fragments of crystal packing of polymorphic forms I and II.....                           | 2  |
| 2. Crystal structure of the form I, in CIF format, optimized by PBE0-D3/POB-TZVP method..... | 3  |
| 3. Crystal structure 1b, in CIF format, optimized by PBE0-D3/POB-TZVP method.....            | 4  |
| 4. List of bond critical points in polymorphs I and II.....                                  | 5  |
| 5. Powder diffraction pattern of form I.....                                                 | 10 |
| 6. Differential scanning calorimetry for form I.....                                         | 11 |

## 1. Fragments of crystal packing of polymorphic forms I and II

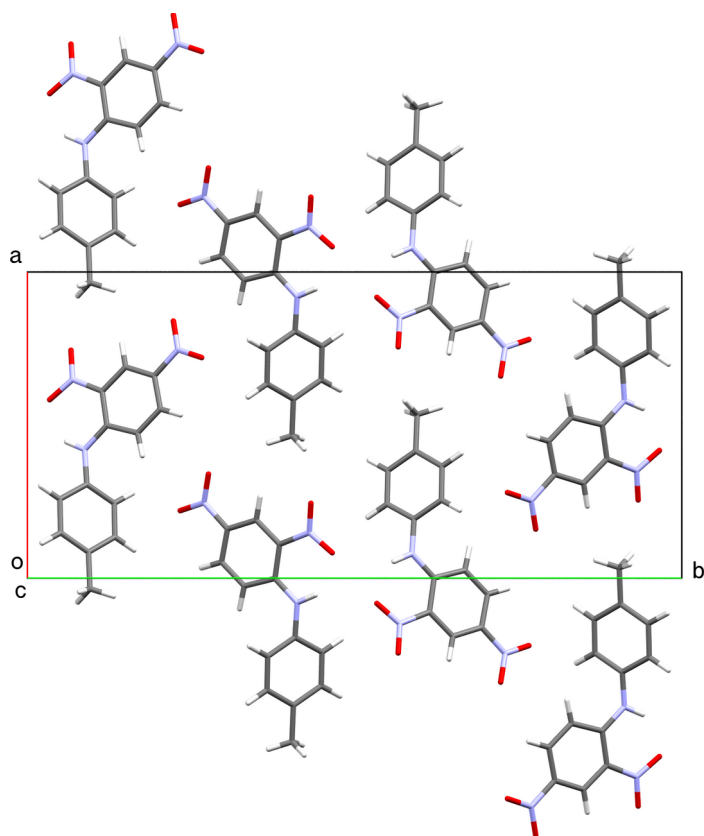

Figure. S1. Fragment of crystal packing of the polymorph **I**, view along the crystallographic *c* axis.

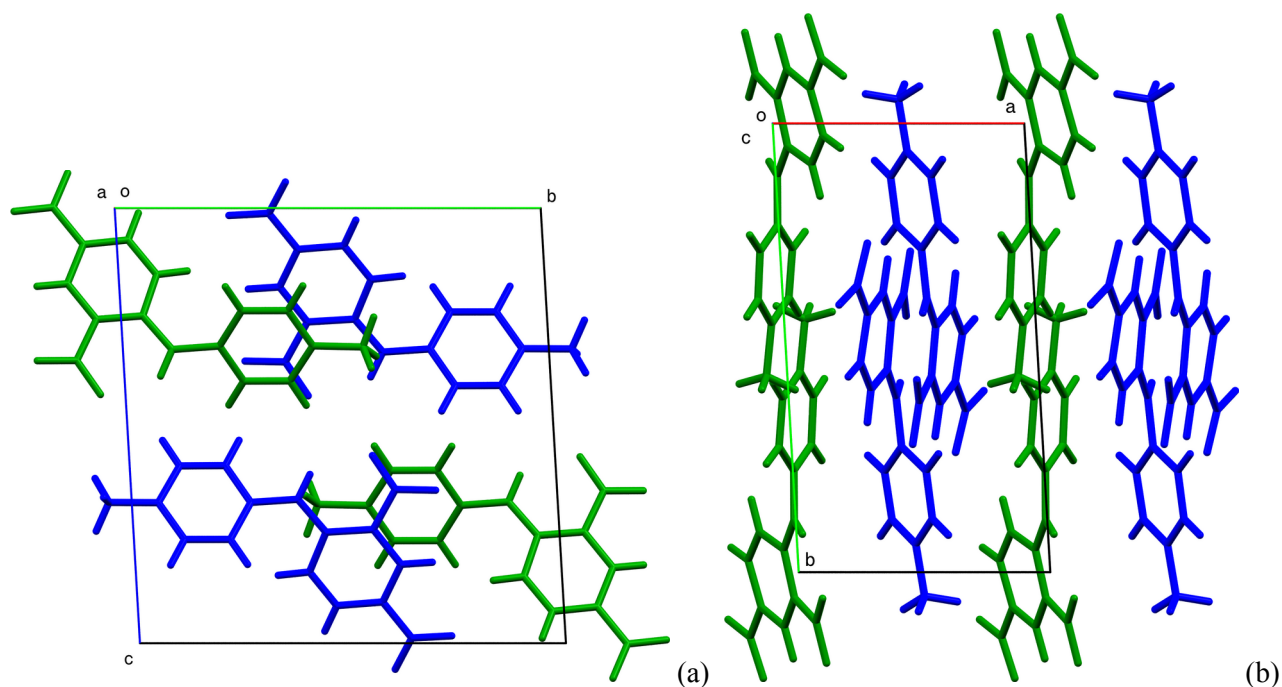

Figure. S2. Fragments of crystal packing of the polymorph **II**, view along the crystallographic *a* axis (a) and along the crystallographic *c* axis (b). The crystallographically independent molecules are shown in blue and green.

## 2. Crystal structure of the form I, in CIF format, optimized by PBE0-D3/POB-TZVP method

Listing S1: Coordinates of form I optimized by PBE0-D3/POB-TZVP method

```
data_la-pbe0d3
_symmetry_cell_setting      orthorhombic
_symmetry_space_group_name_H-M 'P 21 21 2'
loop_
_symmetry_equiv_pos_site_id
_symmetry_equiv_pos_as_xyz
1 x,y,z
2 -x,-y,z
3 1/2+x,1/2-y,-z
4 1/2-x,1/2+y,-z
_cell_length_a              12.2141
_cell_length_b              26.1179
_cell_length_c              3.8006
_cell_angle_alpha           90.000
_cell_angle_beta            90.000
_cell_angle_gamma           90.000
_cell_volume                 1212.42
loop_
_atom_site_label
_atom_site_type_symbol
_atom_site_fract_x
_atom_site_fract_y
_atom_site_fract_z
_atom_site_U_iso_or_equiv
_atom_site_thermal_displace_type
O1 O 0.08367 0.46083 0.18102 0.0300 Uiso
O2 O 0.2475 0.42557 0.1876 0.0300 Uiso
O3 O 0.32266 0.27108 0.76135 0.0300 Uiso
O4 O 0.19158 0.23072 1.0521 0.0300 Uiso
N1 N 0.14786 0.42454 0.26733 0.0300 Uiso
N2 N 0.22441 0.26648 0.85634 0.0300 Uiso
N3 N -0.08245 0.41251 0.44535 0.0300 Uiso
H3N H -0.05158 0.44475 0.33521 0.0300 Uiso
C1 C -0.00851 0.37721 0.53507 0.0300 Uiso
C2 C 0.10529 0.38215 0.45414 0.0300 Uiso
C3 C 0.18053 0.34517 0.55533 0.0300 Uiso
H3A H 0.26576 0.35033 0.48966 0.0300 Uiso
C4 C 0.1459 0.30332 0.74188 0.0300 Uiso
C5 C 0.03471 0.29681 0.82555 0.0300 Uiso
H5A H 0.00843 0.26369 0.97395 0.0300 Uiso
C6 C -0.03946 0.3323 0.72136 0.0300 Uiso
H6A H -0.1251 0.32686 0.78161 0.0300 Uiso
C7 C -0.19576 0.4114 0.53165 0.0300 Uiso
C8 C -0.23899 0.4523 0.71794 0.0300 Uiso
H8A H -0.18651 0.48335 0.80293 0.0300 Uiso
C9 C -0.34829 0.45187 0.80687 0.0300 Uiso
H9A H -0.3803 0.48254 0.96974 0.0300 Uiso
C10 C -0.41599 0.41152 0.70926 0.0300 Uiso
C11 C -0.37137 0.3717 0.51508 0.0300 Uiso
H11A H -0.42295 0.34015 0.43204 0.0300 Uiso
C12 C -0.26191 0.37135 0.42493 0.0300 Uiso
H12A H -0.22892 0.34026 0.26996 0.0300 Uiso
C13 C -0.53382 0.41121 0.81424 0.0300 Uiso
H13A H -0.57222 0.37457 0.75425 0.0300 Uiso
H13B H -0.58032 0.44142 0.68294 0.0300 Uiso
H13C H -0.54192 0.41761 1.0963 0.0300 Uiso
```

### 3. Crystal structure 1b, in CIF format, optimized by PBE0-D3/POB-TZVP method

Listing S2: Coordinates of form II optimized by PBE0-D3/POB-TZVP method

```
data_lb-pbe0d3
_symmetry_cell_setting      triclinic
_symmetry_space_group_name_H-M 'P -1'
loop_
_symmetry_equiv_pos_site_id
_symmetry_equiv_pos_as_xyz
1 x,y,z
2 -x,-y,-z
_cell_length_a              7.1979
_cell_length_b              12.8243
_cell_length_c              13.1514
_cell_angle_alpha           86.287
_cell_angle_beta            83.627
_cell_angle_gamma           86.296
_cell_volume                 1201.93
loop_
_atom_site_label
_atom_site_type_symbol
_atom_site_fract_x
_atom_site_fract_y
_atom_site_fract_z
_atom_site_U_iso_or_equiv
_atom_site_thermal_displace_type
O1 O 0.49069 -0.43033 -0.42451 0.0300 Uiso
O2 O 0.47931 -0.28499 -0.34296 0.0300 Uiso
O3 O 0.65136 -0.27661 -0.01119 0.0300 Uiso
O4 O 0.75707 -0.42102 0.06959 0.0300 Uiso
N1 N 0.51 -0.38193 -0.34541 0.0300 Uiso
N2 N 0.69349 -0.37368 -0.00736 0.0300 Uiso
N3 N 0.57432 -0.60995 -0.33131 0.0300 Uiso
H3N H 0.54192 -0.56996 -0.39684 0.0300 Uiso
C1 C 0.60419 -0.55123 -0.25498 0.0300 Uiso
C2 C 0.57104 -0.44006 -0.25835 0.0300 Uiso
C3 C 0.59766 -0.38286 -0.17619 0.0300 Uiso
H3 H 0.56364 -0.29956 -0.1801 0.0300 Uiso
C4 C 0.66596 -0.43261 -0.09135 0.0300 Uiso
C5 C 0.71096 -0.54081 -0.08729 0.0300 Uiso
H5 H 0.77135 -0.57831 -0.02177 0.0300 Uiso
C6 C 0.67751 -0.59777 -0.16592 0.0300 Uiso
H6 H 0.71077 -0.68109 -0.16232 0.0300 Uiso
C7 C 0.57287 -0.7208 -0.32748 0.0300 Uiso
C8 C 0.64924 -0.77239 -0.41309 0.0300 Uiso
H8 H 0.71933 -0.72906 -0.47808 0.0300 Uiso
C9 C 0.63236 -0.87902 -0.41508 0.0300 Uiso
H9 H 0.6877 -0.9191 -0.48291 0.0300 Uiso
C10 C 0.54374 -0.93598 -0.33216 0.0300 Uiso
C11 C 0.47298 -0.88291 -0.24601 0.0300 Uiso
H11 H 0.40138 -0.9261 -0.18118 0.0300 Uiso
C12 C 0.48284 -0.77604 -0.24379 0.0300 Uiso
H12 H 0.41593 -0.73513 -0.17872 0.0300 Uiso
C13 C 0.51901 -1.05039 -0.33599 0.0300 Uiso
H13A H 0.58596 -1.08148 -0.40696 0.0300 Uiso
H13B H 0.37104 -1.06657 -0.3297 0.0300 Uiso
H13C H 0.57601 -1.09462 -0.27176 0.0300 Uiso
O1' O 0.08866 0.05314 -0.42466 0.0300 Uiso
O2' O 0.08666 0.19764 -0.34273 0.0300 Uiso
O3' O -0.16816 0.22333 -0.00222 0.0300 Uiso
O4' O -0.27587 0.08445 0.08844 0.0300 Uiso
N1' N 0.05237 0.10329 -0.34396 0.0300 Uiso
N2' N -0.20457 0.12812 0.00598 0.0300 Uiso
N3' N -0.01422 -0.1205 -0.32526 0.0300 Uiso
H3N' H 0.02373 -0.08286 -0.39385 0.0300 Uiso
C1' C -0.0619 -0.05844 -0.24747 0.0300 Uiso
C2' C -0.03035 0.05069 -0.2536 0.0300 Uiso
C3' C -0.07586 0.1108 -0.16983 0.0300 Uiso
H3' H -0.0411 0.19175 -0.17604 0.0300 Uiso
C4' C -0.16079 0.06645 -0.08032 0.0300 Uiso
C5' C -0.2044 -0.03897 -0.07304 0.0300 Uiso
H5' H -0.2779 -0.07196 -0.00345 0.0300 Uiso
C6' C -0.15339 -0.09918 -0.15359 0.0300 Uiso
H6' H -0.18719 -0.18024 -0.14738 0.0300 Uiso
C7' C -0.00663 -0.23136 -0.3192 0.0300 Uiso
C8' C -0.06185 -0.28257 -0.39975 0.0300 Uiso
H8' H -0.11947 -0.23807 -0.46306 0.0300 Uiso
C9' C -0.04002 -0.39048 -0.39891 0.0300 Uiso
H9' H -0.08288 -0.42979 -0.46221 0.0300 Uiso
C10' C 0.03272 -0.44924 -0.31828 0.0300 Uiso
C11' C 0.08216 -0.39644 -0.23735 0.0300 Uiso
H11' H 0.14034 -0.44057 -0.17405 0.0300 Uiso
C12' C 0.06627 -0.28845 -0.23797 0.0300 Uiso
H12' H 0.11654 -0.24878 -0.17696 0.0300 Uiso
C13' C 0.0656 -0.5654 -0.32051 0.0300 Uiso
H13C H 0.07227 -0.6017 -0.24371 0.0300 Uiso
H13D H 0.19851 -0.58629 -0.36503 0.0300 Uiso
H13E H -0.04261 -0.60116 -0.35584 0.0300 Uiso
```

#### 4. List of bond critical points in polymorphs I and II.

The sets of BCPs are obtained by topological analysis of the theoretical  $\rho(\mathbf{r})$  function calculated by PBE0-D3/POB-TZVP method for optimized crystal structures.

$d_{12}$  is the distance between the atoms;

$\rho(\mathbf{r})$ ,  $\nabla^2\rho(\mathbf{r})$  and  $\varepsilon$  are the value of electron density, laplassian of electron density and ellipticity in the BCP

$E_{\text{EML}}$  is the interaction energy estimated by Espinosa–Molins–Lecomte correlation

sym. op. is the symmetry operation that generates Atom 2.

Table S1. Bond critical points corresponding to intramolecular interactions in form I.

| #  | Atom 1 | Atom 2 | $d_{12}$ , Å | $\rho(\mathbf{r})$ , e Å <sup>-3</sup> | $\nabla^2\rho(\mathbf{r})$ , e Å <sup>-5</sup> | $\varepsilon$ |
|----|--------|--------|--------------|----------------------------------------|------------------------------------------------|---------------|
| 1  | O1     | N1     | 1.273        | 2.73                                   | -10.48                                         | 0.10          |
| 2  | C2     | N1     | 1.414        | 1.883                                  | -16.62                                         | 0.25          |
| 3  | H3N    | O1     | 1.802        | 0.266                                  | 3.420                                          | 0.02          |
| 4  | N3     | C7     | 1.423        | 1.834                                  | -17.57                                         | 0.05          |
| 5  | C7     | C8     | 1.386        | 2.153                                  | -22.83                                         | 0.22          |
| 6  | N1     | O2     | 1.254        | 2.848                                  | -11.72                                         | 0.09          |
| 7  | N2     | O3     | 1.259        | 2.815                                  | -11.22                                         | 0.09          |
| 8  | O4     | N2     | 1.260        | 2.816                                  | -11.26                                         | 0.10          |
| 9  | C4     | N2     | 1.426        | 1.848                                  | -16.72                                         | 0.18          |
| 10 | C5     | C4     | 1.405        | 2.081                                  | -21.99                                         | 0.16          |
| 11 | C12    | H6     | 2.445        | 0.094                                  | 1.200                                          | 3.20          |
| 12 | C11    | C12    | 1.380        | 2.159                                  | -22.77                                         | 0.19          |
| 13 | C4     | C3     | 1.370        | 2.219                                  | -23.96                                         | 0.23          |
| 14 | C2     | C3     | 1.388        | 2.142                                  | -22.62                                         | 0.21          |
| 15 | C1     | C2     | 1.429        | 1.999                                  | -20.60                                         | 0.20          |
| 16 | N3     | H3N    | 1.013        | 2.255                                  | -45.70                                         | 0.03          |
| 17 | N3     | C1     | 1.335        | 2.277                                  | -26.22                                         | 0.15          |
| 18 | C6     | C1     | 1.421        | 2.023                                  | -21.05                                         | 0.15          |
| 19 | C12    | C7     | 1.383        | 2.168                                  | -23.02                                         | 0.23          |
| 20 | C6     | C5     | 1.355        | 2.251                                  | -24.05                                         | 0.24          |
| 21 | C3     | H3     | 1.079        | 1.966                                  | -25.90                                         | 0.00          |
| 22 | C5     | H5     | 1.081        | 1.956                                  | -25.56                                         | 0.00          |
| 23 | C6     | H6     | 1.080        | 1.951                                  | -25.07                                         | 0.02          |
| 24 | C9     | C8     | 1.377        | 2.169                                  | -22.87                                         | 0.20          |
| 25 | C8     | H8     | 1.083        | 1.930                                  | -24.55                                         | 0.01          |
| 26 | C10    | C9     | 1.390        | 2.132                                  | -22.31                                         | 0.19          |
| 27 | C9     | H9     | 1.085        | 1.919                                  | -24.18                                         | 0.01          |
| 28 | C13    | C10    | 1.493        | 1.761                                  | -16.73                                         | 0.03          |
| 29 | C10    | C11    | 1.387        | 2.145                                  | -22.47                                         | 0.20          |
| 30 | C11    | H11A   | 1.084        | 1.919                                  | -24.17                                         | 0.01          |
| 31 | C12    | H12    | 1.081        | 1.934                                  | -24.57                                         | 0.01          |
| 32 | C13    | H13C   | 1.089        | 1.878                                  | -22.85                                         | 0.01          |
| 33 | C13    | H13A   | 1.090        | 1.874                                  | -22.77                                         | 0.01          |
| 34 | C13    | H13B   | 1.093        | 1.861                                  | -22.51                                         | 0.01          |

Table S2. Bond critical points corresponding to intermolecular interactions in form I.

| #  | Atom 1 | Atom 2 | $d_{12}$ , Å | $\rho(r)$ , e Å <sup>-3</sup> | $\nabla^2\rho(r)$ , e Å <sup>-5</sup> | $\epsilon$ | $E_{\text{EML}}$ | sym.op. for atom 2 |
|----|--------|--------|--------------|-------------------------------|---------------------------------------|------------|------------------|--------------------|
| 1  | O2     | H9A    | 3.013        | 0.02                          | 0.28                                  | 0.21       | 0.47             | -x,-y+1,z+1        |
| 2  | O1     | O1     | 2.892        | 0.044                         | 0.87                                  | 0.47       | 1.45             | -x,-y+1,z          |
| 3  | O1     | H8A    | 2.402        | 0.068                         | 0.88                                  | 0.04       | 1.66             | -x,-y+1,z+1        |
| 4  | H3N    | O1     | 2.565        | 0.034                         | 0.54                                  | 1.86       | 0.86             | -x,-y+1,z          |
| 5  | O2     | C3     | 3.294        | 0.033                         | 0.50                                  | 1.85       | 0.78             | x,y,z+1            |
| 6  | O2     | H13C   | 2.604        | 0.048                         | 0.84                                  | 0.51       | 1.58             | x-1,y,z+1          |
| 7  | O2     | H13B   | 2.853        | 0.027                         | 0.38                                  | 0.18       | 0.65             | x-1,y,z            |
| 8  | O1     | H8A    | 3.048        | 0.022                         | 0.32                                  | 0.30       | 0.47             | -x,-y+1,z          |
| 9  | C4     | C3     | 3.306        | 0.040                         | 0.55                                  | 1.83       | 0.90             | x,y,z-1            |
| 10 | O3     | H5A    | 2.643        | 0.038                         | 0.52                                  | 0.04       | 0.95             | x-1/2,-y+1/2,-z+2  |
| 11 | O4     | H12A   | 2.425        | 0.066                         | 0.92                                  | 0.06       | 1.80             | x-1/2,-y+1/2,-z+1  |
| 12 | O3     | H13A   | 2.993        | 0.021                         | 0.25                                  | 2.07       | 0.46             | x-1,y,z            |
| 13 | O4     | H6A    | 2.770        | 0.032                         | 0.38                                  | 0.12       | 0.70             | x-1/2,-y+1/2,-z+2  |
| 14 | O3     | C6     | 3.673        | 0.013                         | 0.21                                  | 0.66       | 0.25             | x-1/2,-y+1/2,-z+1  |
| 15 | C4     | O4     | 3.283        | 0.034                         | 0.49                                  | 0.70       | 0.76             | x,y,z+1            |
| 16 | H3A    | H13A   | 2.308        | 0.034                         | 0.39                                  | 0.12       | 0.77             | x-1,y,z            |
| 17 | C11    | O4     | 3.233        | 0.031                         | 0.50                                  | 1.48       | 0.79             | x+1/2,-y+1/2,-z+2  |
| 18 | C6     | C1     | 3.329        | 0.037                         | 0.55                                  | 3.42       | 0.82             | x,y,z-1            |
| 19 | C8     | C7     | 3.314        | 0.041                         | 0.61                                  | 4.47       | 0.94             | x,y,z-1            |
| 20 | C13    | H13C   | 2.735        | 0.046                         | 0.54                                  | 0.95       | 1.16             | x,y,z+1            |
| 21 | H12A   | H6A    | 2.275        | 0.037                         | 0.42                                  | 0.15       | 0.87             | x,y,z+1            |
| 22 | C10    | C11    | 3.280        | 0.043                         | 0.62                                  | 2.40       | 1.00             | x,y,z-1            |
| 23 | H13B   | H9A    | 2.316        | 0.043                         | 0.50                                  | 0.35       | 1.04             | -x-1,-y+1,z        |
| 24 | H13C   | C10    | 2.796        | 0.043                         | 0.56                                  | 6.00       | 1.14             | x,y,z-1            |

Table S3. Bond critical points corresponding to intramolecular interactions in form II.

| #  | Atom 1 | Atom 2 | $d_{12}$ , Å | $\rho(r)$ , e Å <sup>-3</sup> | $\nabla^2\rho(r)$ , e Å <sup>-5</sup> | $\varepsilon$ |
|----|--------|--------|--------------|-------------------------------|---------------------------------------|---------------|
| 1  | O1     | N1     | 1.270        | 2.750                         | -10.84                                | 0.10          |
| 2  | O2     | N1     | 1.250        | 2.878                         | -12.14                                | 0.09          |
| 3  | O3     | N2     | 1.261        | 2.800                         | -11.11                                | 0.09          |
| 4  | O4     | N2     | 1.261        | 2.806                         | -11.35                                | 0.09          |
| 5  | N1     | C2     | 1.421        | 1.870                         | -16.84                                | 0.23          |
| 6  | N2     | C4     | 1.417        | 1.875                         | -16.68                                | 0.20          |
| 7  | N3     | C1     | 1.337        | 2.259                         | -25.87                                | 0.15          |
| 8  | N3     | C7     | 1.420        | 1.850                         | -17.9                                 | 0.06          |
| 9  | N3     | H3N    | 1.016        | 2.248                         | -45.69                                | 0.03          |
| 10 | C2     | C3     | 1.382        | 2.166                         | -23.03                                | 0.21          |
| 11 | C4     | C5     | 1.403        | 2.089                         | -22.13                                | 0.16          |
| 12 | C3     | C4     | 1.372        | 2.207                         | -23.82                                | 0.22          |
| 13 | C1     | C6     | 1.419        | 2.035                         | -21.26                                | 0.15          |
| 14 | C7     | C8     | 1.385        | 2.158                         | -22.95                                | 0.22          |
| 15 | C2     | C1     | 1.429        | 2.000                         | -20.64                                | 0.20          |
| 16 | C6     | C5     | 1.355        | 2.257                         | -24.19                                | 0.24          |
| 17 | C6     | H6     | 1.080        | 1.955                         | -25.09                                | 0.01          |
| 18 | C3     | H3     | 1.080        | 1.963                         | -25.83                                | 0.00          |
| 19 | C5     | H5     | 1.079        | 1.957                         | -25.5                                 | 0.00          |
| 20 | C7     | C12    | 1.390        | 2.134                         | -22.47                                | 0.22          |
| 21 | C8     | C9     | 1.383        | 2.150                         | -22.58                                | 0.19          |
| 22 | C11    | C12    | 1.379        | 2.157                         | -22.59                                | 0.20          |
| 23 | C8     | H8     | 1.083        | 1.930                         | -24.55                                | 0.01          |
| 24 | C9     | H9     | 1.083        | 1.926                         | -24.31                                | 0.01          |
| 25 | C10    | C9     | 1.390        | 2.135                         | -22.29                                | 0.19          |
| 26 | C13    | C10    | 1.494        | 1.754                         | -16.61                                | 0.03          |
| 27 | C11    | C10    | 1.39         | 2.129                         | -22.21                                | 0.19          |
| 28 | C11    | H11    | 1.085        | 1.917                         | -24.1                                 | 0.01          |
| 29 | C12    | H12    | 1.083        | 1.931                         | -24.56                                | 0.01          |
| 30 | C13    | H13A   | 1.089        | 1.889                         | -23.17                                | 0.01          |
| 31 | C13    | H13B   | 1.091        | 1.862                         | -22.48                                | 0.01          |
| 32 | C13    | H13C   | 1.090        | 1.872                         | -22.71                                | 0.01          |
| 33 | O1     | H3N    | 1.826        | 0.252                         | 3.290                                 | 0.02          |
| 34 | C12    | H6     | 2.478        | 0.093                         | 1.200                                 | 1.58          |

Table TS3 (continued)

| #  | Atom 1 | Atom 2 | $d_{12}$ , Å | $\rho(r)$ , e Å <sup>-3</sup> | $\nabla^2\rho(r)$ , e Å <sup>-5</sup> | $\varepsilon$ |
|----|--------|--------|--------------|-------------------------------|---------------------------------------|---------------|
| 35 | O1'    | N1'    | 1.270        | 2.745                         | -10.67                                | 0.10          |
| 36 | O2'    | N1'    | 1.252        | 2.866                         | -11.98                                | 0.09          |
| 37 | O3'    | N2'    | 1.261        | 2.805                         | -11.20                                | 0.09          |
| 38 | O4'    | N2'    | 1.260        | 2.808                         | -11.26                                | 0.09          |
| 39 | N1'    | C2'    | 1.419        | 1.875                         | -16.87                                | 0.23          |
| 40 | N2'    | C4'    | 1.420        | 1.869                         | -16.79                                | 0.19          |
| 41 | N3'    | C1'    | 1.338        | 2.256                         | -25.84                                | 0.14          |
| 42 | N3'    | C7'    | 1.417        | 1.861                         | -18.15                                | 0.06          |
| 43 | N3'    | H3N'   | 1.014        | 2.260                         | -45.67                                | 0.03          |
| 44 | C2'    | C3'    | 1.383        | 2.162                         | -22.97                                | 0.21          |
| 45 | C3'    | C4'    | 1.372        | 2.210                         | -23.84                                | 0.22          |
| 46 | C4'    | C5'    | 1.402        | 2.090                         | -22.14                                | 0.16          |
| 47 | C6'    | C1'    | 1.418        | 2.037                         | -21.27                                | 0.15          |
| 48 | C8'    | C7'    | 1.389        | 2.147                         | -22.78                                | 0.22          |
| 49 | C1'    | C2'    | 1.428        | 2.006                         | -20.74                                | 0.20          |
| 50 | C5'    | C6'    | 1.355        | 2.257                         | -24.22                                | 0.24          |
| 51 | C3'    | H3'    | 1.079        | 1.964                         | -25.80                                | 0.00          |
| 52 | C5'    | H5'    | 1.081        | 1.954                         | -25.39                                | 0.00          |
| 53 | C6'    | H6'    | 1.079        | 1.957                         | -25.14                                | 0.02          |
| 54 | C7'    | C12'   | 1.388        | 2.144                         | -22.64                                | 0.22          |
| 55 | C8'    | C9'    | 1.382        | 2.149                         | -22.48                                | 0.20          |
| 56 | C12'   | C11'   | 1.382        | 2.151                         | -22.52                                | 0.20          |
| 57 | C8'    | H8'    | 1.084        | 1.930                         | -24.59                                | 0.01          |
| 58 | C9'    | H9'    | 1.083        | 1.919                         | -24.13                                | 0.01          |
| 59 | C9'    | C10'   | 1.391        | 2.128                         | -22.20                                | 0.19          |
| 60 | C10'   | C11'   | 1.388        | 2.138                         | -22.33                                | 0.19          |
| 61 | C10'   | C13'   | 1.495        | 1.755                         | -16.63                                | 0.03          |
| 62 | C11'   | H11'   | 1.084        | 1.928                         | -24.40                                | 0.01          |
| 63 | C12'   | H12'   | 1.084        | 1.933                         | -24.62                                | 0.01          |
| 64 | C13'   | H13D   | 1.089        | 1.886                         | -23.08                                | 0.01          |
| 65 | C13'   | H13E   | 1.092        | 1.855                         | -22.34                                | 0.01          |
| 66 | C13    | H13F'  | 1.089        | 1.879                         | -22.89                                | 0.01          |
| 67 | O1'    | H3N'   | 1.843        | 0.244                         | 3.210                                 | 0.04          |
| 68 | H6'    | C12'   | 2.465        | 0.096                         | 1.240                                 | 1.15          |



Table S4. Bond critical points corresponding to intermolecular interactions in form II.

| #  | Atom 1 | Atom 2 | $d_{12}$ , Å | $\rho(\mathbf{r})$ , e Å <sup>-3</sup> | $\nabla^2\rho(\mathbf{r})$ , e Å <sup>-5</sup> | $\epsilon$ | $E_{\text{EML}}$ | sym. op. for atom 2 |
|----|--------|--------|--------------|----------------------------------------|------------------------------------------------|------------|------------------|---------------------|
| 1  | C2'    | C10    | 3.333        | 0.041                                  | 0.54                                           | 1.03       | 0.87             | x-1,y+1,z           |
| 2  | N1'    | C9     | 3.252        | 0.038                                  | 0.59                                           | 0.54       | 1.03             | x-1,y+1,z           |
| 3  | H8'    | O1'    | 2.720        | 0.037                                  | 0.49                                           | 0.78       | 0.87             | -x,-y,-z-1          |
| 4  | C6'    | H13C   | 2.619        | 0.059                                  | 0.68                                           | 0.93       | 1.53             | x+1,y-1,z           |
| 5  | H3N'   | O1'    | 2.601        | 0.035                                  | 0.53                                           | 1.39       | 0.86             | -x,-y,-z-1          |
| 6  | O1'    | H9     | 2.550        | 0.043                                  | 0.62                                           | 0.12       | 1.13             | -x+1,-y-1,-z-1      |
| 7  | H8'    | O2'    | 2.561        | 0.049                                  | 0.64                                           | 0.05       | 1.17             | -x,-y,-z-1          |
| 8  | H13F   | O2'    | 2.687        | 0.044                                  | 0.75                                           | 0.53       | 1.39             | x,y+1,z             |
| 9  | O2'    | C11    | 3.265        | 0.038                                  | 0.54                                           | 1.75       | 0.87             | x,y-1,z             |
| 10 | O3'    | H12'   | 2.471        | 0.059                                  | 0.75                                           | 0.01       | 1.42             | -x,-y,-z            |
| 11 | O3'    | H5     | 2.554        | 0.043                                  | 0.71                                           | 0.25       | 1.28             | x-1,y+1,z           |
| 12 | O3'    | H6     | 2.575        | 0.050                                  | 0.71                                           | 0.16       | 1.36             | x-1,y+1,z           |
| 13 | O3'    | O3     | 3.488        | 0.016                                  | 0.23                                           | 0.02       | 0.33             | -x,-y,-z            |
| 14 | N2'    | C6'    | 3.382        | 0.036                                  | 0.60                                           | 7.55       | 0.97             | -x,-y,-z            |
| 15 | O3'    | O3     | 3.850        | 0.007                                  | 0.10                                           | 0.65       | 0.14             | -x+1,-y,-z          |
| 16 | O4'    | H11    | 2.470        | 0.052                                  | 0.73                                           | 0.03       | 1.37             | -x,-y-1,-z          |
| 17 | O4'    | H13C   | 3.057        | 0.019                                  | 0.32                                           | 0.90       | 0.47             | -x,-y-1,-z          |
| 18 | C5'    | O4'    | 3.852        | 0.008                                  | 0.14                                           | 0.53       | 0.15             | -x-1,-y,-z          |
| 19 | O1'    | H13B   | 2.821        | 0.033                                  | 0.44                                           | 0.12       | 0.80             | x,y-1,z             |
| 20 | N3'    | H13B   | 2.895        | 0.030                                  | 0.36                                           | 0.21       | 0.66             | x,y-1,z             |
| 21 | O1'    | O1'    | 2.924        | 0.046                                  | 0.85                                           | 0.55       | 1.43             | -x,-y,-z-1          |
| 22 | H3'    | H6     | 2.339        | 0.034                                  | 0.40                                           | 0.19       | 0.80             | x-1,y+1,z           |
| 23 | C3'    | C11    | 3.498        | 0.026                                  | 0.45                                           | 1.55       | 0.59             | x-1,y+1,z           |
| 24 | H5'    | O3     | 2.716        | 0.033                                  | 0.57                                           | 1.39       | 0.98             | x-1,y,z             |
| 25 | H6'    | O3     | 2.350        | 0.075                                  | 1.09                                           | 0.07       | 2.17             | x-1,y,z             |
| 26 | C8'    | H8     | 2.796        | 0.039                                  | 0.42                                           | 0.20       | 0.86             | -x+1,-y-1,-z-1      |
| 27 | C12'   | O2     | 3.138        | 0.045                                  | 0.61                                           | 0.62       | 1.11             | x,y,z               |
| 28 | H8'    | H13A   | 2.893        | 0.012                                  | 0.18                                           | 0.36       | 0.26             | x-1,y+1,z           |
| 29 | C9'    | C2     | 3.254        | 0.049                                  | 0.61                                           | 2.13       | 1.10             | x-1,y,z             |
| 30 | C13'   | H9'    | 2.851        | 0.038                                  | 0.49                                           | 1.60       | 0.98             | -x,-y-1,-z-1        |
| 31 | H9'    | H9'    | 2.312        | 0.040                                  | 0.46                                           | 0.14       | 0.95             | -x,-y-1,-z-1        |
| 32 | C13'   | C6     | 3.300        | 0.043                                  | 0.61                                           | 5.02       | 1.19             | x-1,y,z             |
| 33 | H11'   | O4     | 2.307        | 0.069                                  | 1.05                                           | 0.04       | 1.97             | -x+1,-y-1,-z        |
| 34 | C11'   | C4     | 3.415        | 0.032                                  | 0.49                                           | 0.93       | 0.70             | x-1,y,z             |
| 35 | O4     | C6     | 3.242        | 0.041                                  | 0.63                                           | 2.98       | 1.06             | -x+1,-y-1,-z        |
| 36 | H13E   | N3     | 2.784        | 0.039                                  | 0.50                                           | 0.26       | 0.94             | x,y,z               |
| 37 | H13F   | N3     | 2.749        | 0.048                                  | 0.63                                           | 1.91       | 1.23             | x-1,y,z             |
| 38 | H13D   | O4     | 2.756        | 0.031                                  | 0.41                                           | 0.12       | 0.75             | -x+1,-y-1,-z        |
| 39 | O1     | O1     | 2.743        | 0.062                                  | 1.25                                           | 0.53       | 2.33             | -x+1,-y-1,-z-1      |
| 40 | H3N    | O1     | 2.387        | 0.050                                  | 0.83                                           | 0.50       | 1.31             | -x+1,-y-1,-z-1      |
| 41 | H8     | O1     | 2.792        | 0.037                                  | 0.50                                           | 0.14       | 0.87             | -x+1,-y-1,-z-1      |
| 42 | O2     | C13    | 3.049        | 0.041                                  | 0.75                                           | 0.93       | 1.35             | x,y-1,z             |
| 43 | H8     | O2     | 2.877        | 0.031                                  | 0.44                                           | 0.17       | 0.73             | -x+1,-y-1,-z-1      |
| 44 | H12    | O3     | 2.503        | 0.056                                  | 0.72                                           | 0.04       | 1.37             | -x+1,-y-1,-z        |
| 45 | H12    | O4     | 2.697        | 0.038                                  | 0.50                                           | 2.89       | 0.93             | -x+1,-y-1,-z        |
| 46 | O4     | H5     | 3.382        | 0.009                                  | 0.14                                           | 0.29       | 0.17             | -x+2,-y-1,-z        |
| 47 | H13A   | H9     | 2.571        | 0.032                                  | 0.45                                           | 2.06       | 0.83             | -x+1,-y-2,-z-1      |

## 5. Powder diffraction pattern of form I.

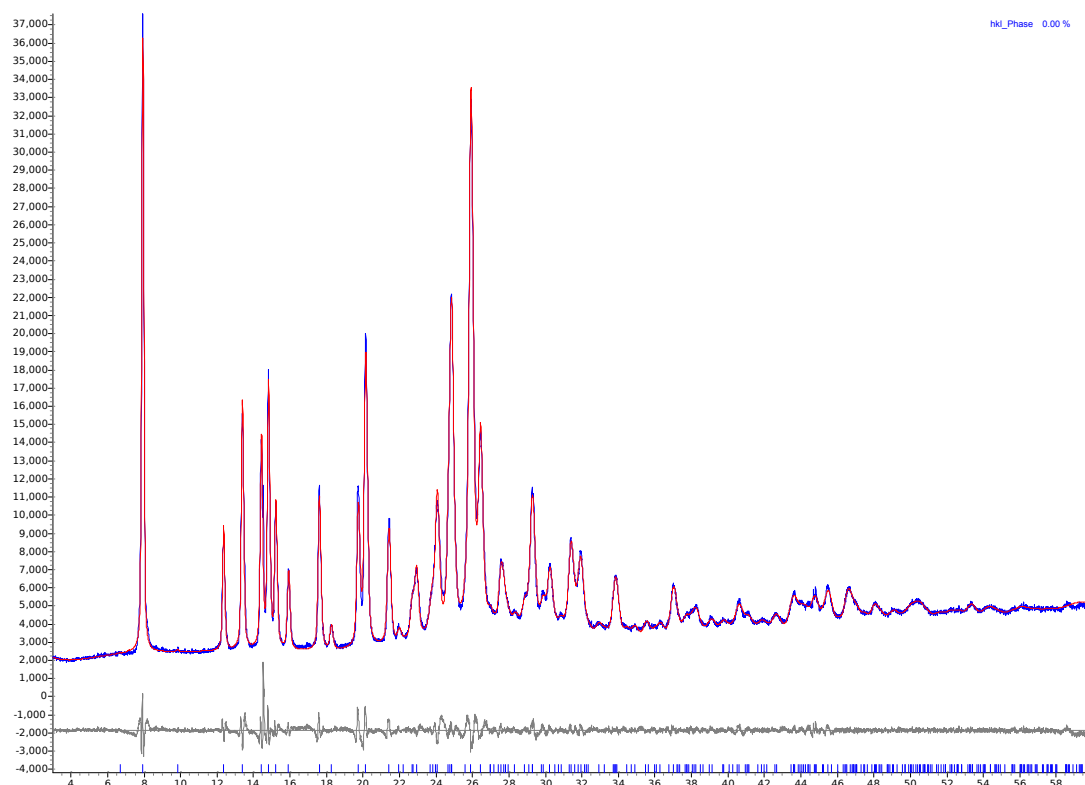

Figure. S3. Observed (blue line) and calculated (red line, Pawley fit,  $R_{wp}=0.0354$ ) powder diffraction patterns for the crystal structure of form **I**.

The refined unit cell parameters (sp. gr.  $P2_12_12_1$ ):

$$a = 12.270(2), b = 26.473(4), c = 3.9189(5) \text{ \AA}, V = 1271.3(4) \text{ \AA}^3, d_{\text{calc}} = 1.428 \text{ g cm}^{-3}.$$

X-ray powder diffraction study of the form **I** was performed on a Bruker AXS D8 diffractometer equipped with a primary monochromator ( $\text{CuK}\alpha_1$ ,  $\lambda = 1.54056 \text{ \AA}$ ) and a LynxEye position sensitive detector. The sample was deposited on a zero-background silicon plate and were rotated with a speed of  $60 \text{ deg}\cdot\text{min}^{-1}$ . Data collections was performed in the reflection mode at ambient temperature (ca. 298 K) with a step size of  $0.01^\circ$  for the  $2\theta$  range of  $5\text{--}60^\circ$ . The unit cell parameters and phase purity of the bulk sample were evaluated by a Pawley fit starting from the single-crystal unit cell parameters. The calculations were performed with the Bruker TOPAS 5.0 software [A. A. Coelho, *J. Appl. Crystallogr.*, 2018, **51**, 210–218; doi: 10.1107/S1600576718000183].

## 6. Differential scanning calorimetry for form I

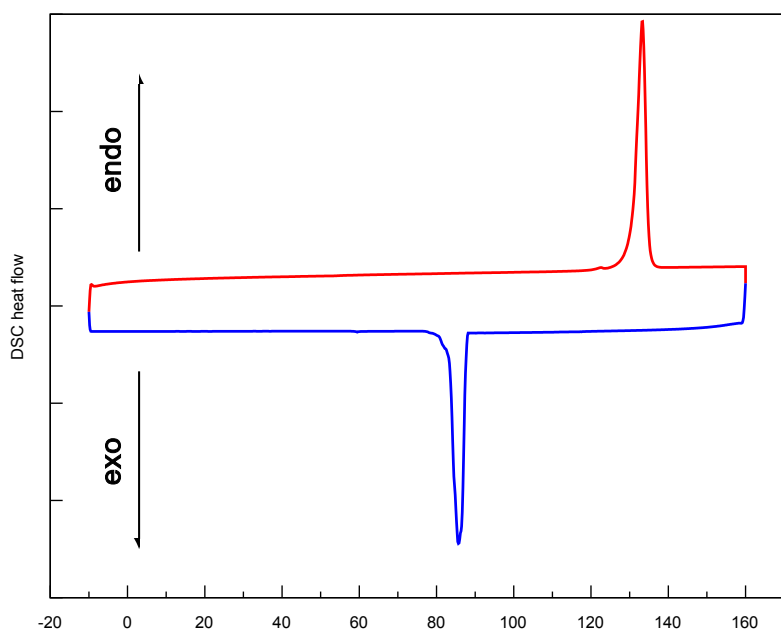

Figure. S4. DSC curves for the powder sample of form **I** upon heating (upper red curve) and cooling (lower blue curve) within the temperatures range  $-10 - 170$  °C.

The calorimetric studies were performed on a Mettler-822e differential scanning calorimeter. The weight of the sample was 2.7 mg, the heating/cooling rate was  $10$  °C  $\text{min}^{-1}$ .
